# Supplementary material for: The MALDI-TOF E2/E3 Ligase Assay as Universal Tool for Drug Discovery in the Ubiquitin Pathway
Source: Cell Chem Biol. 2018 Sep 20;25(9):1117–1127.e4. doi: 10.1016/j.chembiol.2018.06.004 (PMC6162346; doi:10.1016/j.chembiol.2018.06.004)
Supplement: Document S1. Figures S1–S6 and Tables S1–S5 [file mmc1.pdf]

**Cell Chemical Biology, Volume 25**

## **Supplemental Information**

**The MALDI-TOF E2/E3 Ligase**

**Assay as Universal Tool for Drug**

**Discovery in the Ubiquitin Pathway**

**Virginia De Cesare, Clare Johnson, Victoria Barlow, James Hastie, Axel Knebel, and Matthias Trost**

## Supplementary Data

**Table S1: Initial reaction/Instantaneous rate at 5 min of MDM2, ITCH and HOIP (*related to Figure 1*)**

| Instantaneous Rate at $t = 5$ min |      |      |       |                     |
|-----------------------------------|------|------|-------|---------------------|
| $\mu\text{M Ub}$                  | 12.5 | 6.25 | 3.125 |                     |
| MDM2                              | 0.61 | 0.24 | 0.30  | $\mu\text{mol/min}$ |
| ITCH                              | 0.41 | 0.34 | 0.30  | $\mu\text{mol/min}$ |
| HOIP                              | 1.85 | 1.28 | 0.94  | $\mu\text{mol/min}$ |

**Table S2: List of E1 Activating enzymes, E2 conjugating enzymes and E3 ligases used in this study (related to Figure 2 and STAR methods)**

|                       | Name      | Uniprot Accession Number | Alternative Name | Tag | Domain      | Host                 | E2/E3 active pair | Activity       |
|-----------------------|-----------|--------------------------|------------------|-----|-------------|----------------------|-------------------|----------------|
| E1                    | 1 UBE1    | P22314                   | -                | His | full length | <i>S. frugiperda</i> | -                 | -              |
|                       | 2 UBA6    | A0AVT1                   | -                | His | full length | <i>S. frugiperda</i> | -                 | -              |
| E2 Conjugating Enzyme | 3 UBE2A   | P49459                   | -                | His | 2-152       | <i>E. coli</i>       | -                 | -              |
|                       | 4 UBE2B   | P63146                   | -                | His | full length | <i>E. coli</i>       | -                 | -              |
|                       | 5 UBE2C   | O00762                   | UbcH10           | -   | full length | <i>E. coli</i>       | ITCH              | Low            |
|                       | 6 UBE2D1  | P51668                   | UbcH5a           | -   | full length | <i>E. coli</i>       | MDM2-ITCH-HOIP    | High           |
|                       | 7 UBE2D2  | P62837                   | UbcH5b           | His | 2-147       | <i>E. coli</i>       | MDM2-ITCH-HOIP    | High           |
|                       | 8 UBE2D3  | P61077                   | UbcH5c           | His | 2-147       | <i>E. coli</i>       | MDM2-ITCH-HOIP    | Moderate-High  |
|                       | 9 UBE2D4  | Q9Y2X8                   | UbcH5D           | -   | full length | <i>E. coli</i>       | MDM2-ITCH-HOIP    | Moderate-High  |
|                       | 10 UBE2E1 | P51965                   | UbcH6            | His | full length | <i>E. coli</i>       | MDM2-ITCH-HOIP    | Low-Moderate   |
|                       | 11 UBE2E2 | Q96LR5                   | UbcH8            | His | full length | <i>E. coli</i>       | MDM2-HOIP         | Moderate       |
|                       | 12 UBE2E3 | Q969T4                   | UbcH9            | His | full length | <i>E. coli</i>       | MDM2-HOIP         | Moderate       |
|                       | 13 UBE2G1 | P62253                   | Ubc7             | His | full length | <i>E. coli</i>       | -                 | -              |
|                       | 14 UBE2G2 | P60604                   | -                | His | full length | <i>E. coli</i>       | -                 | -              |
|                       | 15 UBE2H  | P62256                   | Ubc8             | His | full length | <i>E. coli</i>       | -                 | -              |
|                       | 16 UBE2J1 | Q9Y385                   | Ubc6e            | His | full length | <i>E. coli</i>       | -                 | -              |
|                       | 17 UBE2J2 | Q8N2K1                   | -                | -   | full length | <i>E. coli</i>       | -                 | -              |
|                       | 18 UBE2K  | P61086                   | Ubc1             | His | full length | <i>E. coli</i>       | MDM2-ITCH-HOIP    | Low            |
|                       | 19 UBE2L3 | P68036                   | UbcH7            | -   | full length | <i>E. coli</i>       | ITCH-HOIP         | Moderate-High  |
|                       | 20 UBE2N  | P61088                   | Ubc13            | His | full length | <i>E. coli</i>       | -                 | -              |
|                       | 21 UBE2O  | Q9C0C9                   | E2-230K          | His | 552-1292    | <i>E. coli</i>       | -                 | Basal Activity |
|                       | 22 UBE2Q1 | Q7Z7E8                   | UBE2Q            | His | full length | <i>E. coli</i>       | -                 | Basal Activity |
|                       | 23 UBE2Q2 | Q8WVN8                   | -                | His | full length | <i>E. coli</i>       | -                 | Basal Activity |
|                       | 24 UBE2R1 | P49427                   | -                | His | 2 – 236     | <i>E. coli</i>       | -                 | -              |
|                       | 25 UBE2R2 | Q712K3                   | Ubc3B            | -   | full length | <i>E. coli</i>       | -                 | -              |
|                       | 26 UBE2S  | Q16763                   | E2-EPF           | His | full length | <i>E. coli</i>       | -                 | -              |
|                       | 27 UBE2T  | Q9NPD8                   | HSPC150          | His | full length | <i>E. coli</i>       | -                 | -              |
|                       | 28 UBE2V1 | Q13404                   | Uev1A            | His | full length | <i>E. coli</i>       | -                 | -              |
|                       | 29 UBE2W  | Q96B02                   | -                | His | full length | <i>E. coli</i>       | -                 | -              |
|                       | 30 UBE2Z  | Q9H832                   | USE1             | His | full length | <i>E. coli</i>       | -                 | -              |
| E3 Ligase             | 31 MDM2   | Q00987                   | -                | GST | 7 - 497     | <i>E. coli</i>       | -                 | -              |
|                       | 32 ITCH   | Q96J02                   | -                | GST | full length | <i>E. coli</i>       | -                 | -              |
|                       | 33 HOIP   | Q96EP0                   | -                | -   | 697-1072    | <i>E. coli</i>       | -                 | -              |

*E. coli*, *Escherichia coli*; *S. frugiperda*, *Spodoptera frugiperda*; \*Low ( $\leq 50\%$  Activity after 2h incubation time); Moderate ( $\geq 50\%$  and  $\leq 80\%$  Activity after 2h incubation time); High 100% Activity after 2h Incubation time

**Table S3 | IC50 calculation of six E1, E2 or E3 inhibitors (related to Figure 4)**

|      | IC50 (μM) |           |           |           |       |           |
|------|-----------|-----------|-----------|-----------|-------|-----------|
|      | PR619     | Nutlin3A  | Gliotoxin | BAY117082 | PYR41 | Compound1 |
| MDM2 | 0.6       | Ambiguous | 0.5       | 2.4       | 3.1   | 1.2       |
| ITCH | 0.4       | Ambiguous | 30.6      | 25.9      | 11.3  | 2.2       |
| HOIP | 0.2       | Ambiguous | 2.8       | 2.9       | 5.7   | 2.3       |

**Table S4 | Hill Slopes values for calculated IC50s (related to Figure 4)**

|      | Hill Slope Values |          |           |           |       |           |
|------|-------------------|----------|-----------|-----------|-------|-----------|
|      | PR619             | Nutlin3A | Gliotoxin | BAY117082 | PYR41 | Compound1 |
| MDM2 | 1.89              | -        | 2.18      | 3.5       | 2.23  | 0.67      |
| ITCH | 3.14              | -        | 5.12      | 1.23      | 1.22  | 0.78      |
| HOIP | 7.8               | -        | 2.01      | 2.48      | 3.73  | 1.14      |

**Table S5 | Z-Prime scores (related to Figure 5)**

|      | Plate |      |      |      |      |
|------|-------|------|------|------|------|
|      | A     | B    | C    | D    | E    |
| MDM2 | 0.64  | 0.57 | 0.63 | 0.62 | 0.55 |
| ITCH | 0.67  | 0.64 | 0.73 | 0.83 | 0.79 |
| HOIP | 0.60  | 0.56 | 0.59 | 0.67 | 0.62 |

**Figure S1**

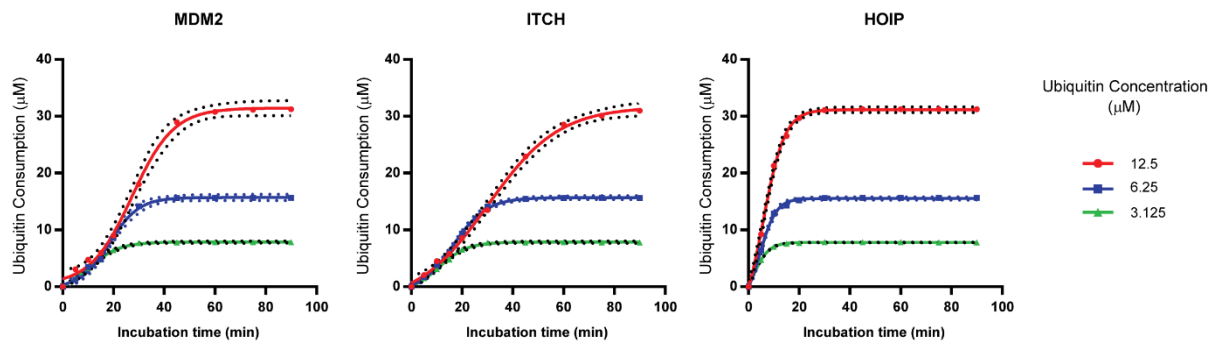

**Figure S1: Substrate consumption over time of MDM2, ITCH and HOIP. (related to Figure 1)**

Rate of disappearance of ubiquitin at different starting concentrations were measured for MDM2, ITCH and HOIP. Ubiquitin consumption (Ubiquitin  $\mu\text{M}$   $t_2$  - Ubiquitin  $\mu\text{M}$   $t_1$ ) was plotted over time. Data are represented as mean  $\pm$  standard deviation.

**Figure S2**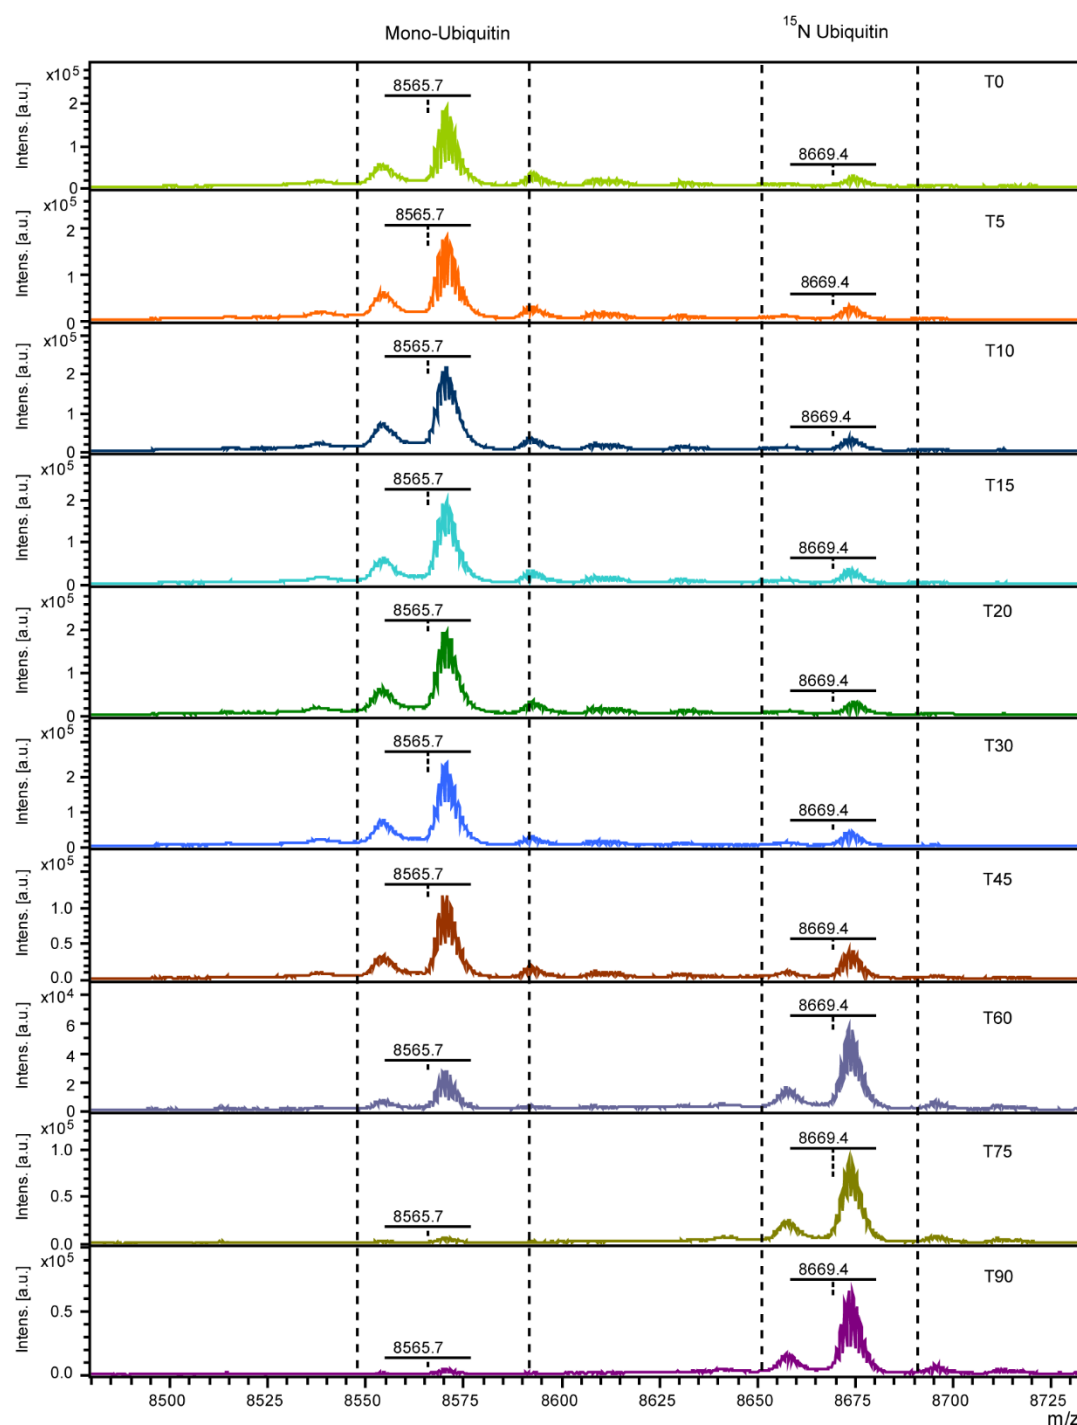

**Figure S2: E2-E3 MALDI-TOF assay representative spectra (related to Figure 1).** MALDI-TOF spectra of MDM2 activity at different time points (indicated as T0, T5 etc.) are reported. MDM2 was incubated with 50 nM E1, 250 nM E2D1, 1 mM ATP, 12.5  $\mu\text{M}$  ubiquitin at 37°C and terminated at the indicated time points by addition of 2.5  $\mu\text{l}$  of 10% (v/v) trifluoroacetic acid (TFA). The samples were spotted and analysed by high mass accuracy MALDI TOF MS as indicated in Material and Methods.

## Figure S3

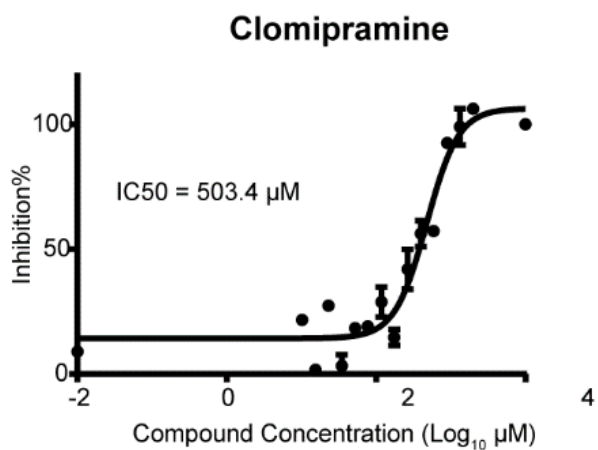

**Figure S3: Clomipramine inhibits ITCH at high concentration (*related to Figure 4*).** Clomipramine was tested against ITCH in a dose-response curve with final concentration values between 2mM and 7  $\mu$ M. The results indicated an IC<sub>50</sub> of 503.4  $\mu$ M. Data are represented as mean  $\pm$  standard deviation.

Figure S4

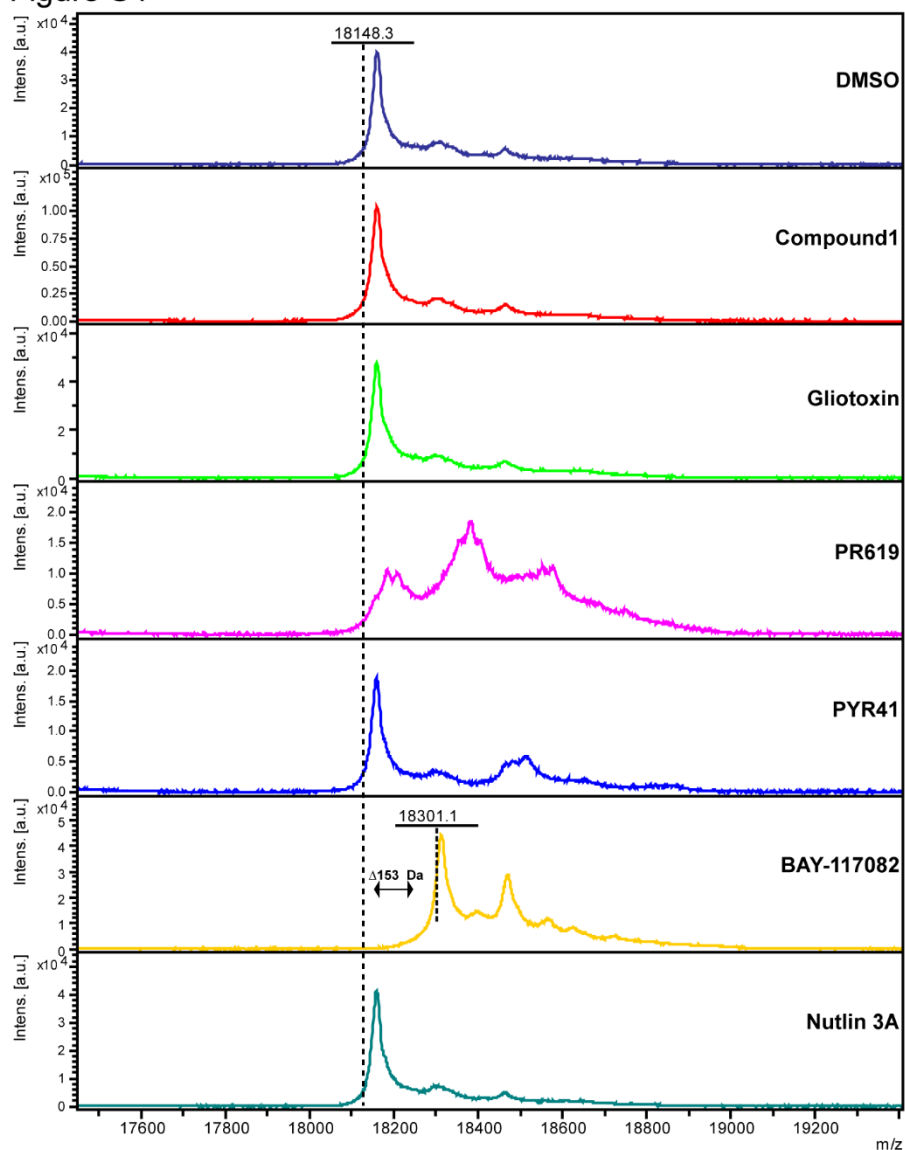

**Figure S4: Covalent modifications of E2 enzymes by inhibitors (related to Figure 4).**

UBE2L3 (3  $\mu$ M) was incubated for 30 min at room temperature with or without the indicated inhibitors (100  $\mu$ M) and subjected to MALDI-TOF-MS. Incubation with BAY 11-7082 increased the molecular mass of UBE2L3 by 153 Da. PR619 extensively modified UBE2L3 indicated several PR619 adducts.

**Figure S5**

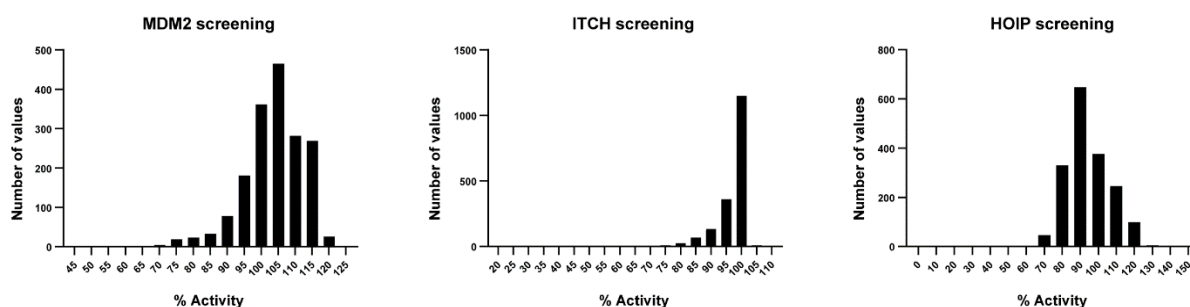

**Figure S5: Frequency distribution of HTS data of MDM2, ITCH and HOIP (related to Figure 5).** Bars report number of values falling within the reported % Activity.

**Figure S6**

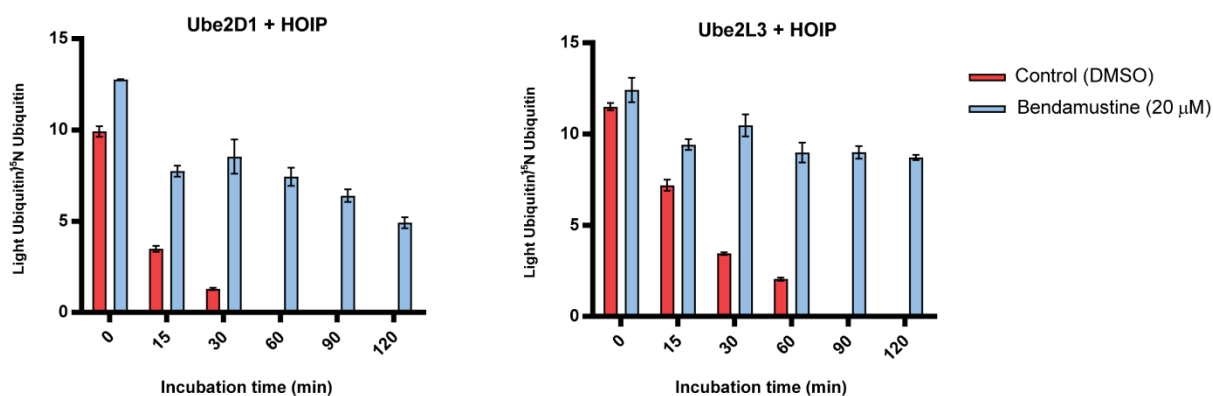

**Figure S6: Bendamustine inhibits HOIP independently from the E2 conjugating enzyme (related to Figure 6).**

Bendamustine (20 µM) was tested against HOIP coupled with Ube2D1 and Ube2L3 over time. Bendamustine inhibits HOIP independently from the E2 in use. Data are represented as mean +/- standard deviation.
